# Supplementary material
Source: publisher site journal article supplement (https://www.spandidos-publications.com/6382/downloadSupplementary)
Supplement: Supplementary file 1 [file downloadSupplementary]

## Sheet: Sheet1
Table SI. Clinical expression characteristics of SLAMF1-9.
	Expression significance, (P-value)
Clinical parameter	SLAMF1	SLAMF2	SLAMF3	SLAMF4	SLAMF5	SLAMF6	SLAMF7	SLAMF8	SLAMF9
Ethnicity
Normal vs. Caucasian	<1E-12	<1E-12	1.62448e-12	1.62448e-12	<1E-12	<1E-12	<1E-12	<1E-12	6.4636e-05
Normal vs. African-American	0.00061977	5.4009e-07	4.0181e-06	1.4043e-07	4.9579e-06	1.51354e-05	9.6641e-05	3.6123e-05	0.073963
Normal vs. Asian	0.039636	0.005277	0.007444	0.00129865	0.0168981	0.032616	0.090443	0.06138	0.069715
Caucasian vs. African-American	0.089255	0.0195813	0.662	0.28494	0.053676	0.031483	0.21388	0.092355	0.90666
Caucasian vs. Asian	0.89846	0.9407	0.58362	0.3989	0.057701	0.77772	0.73546	0.436	0.23506
African-American vs. Asian	0.44584	0.3589	0.62506	0.2736	0.098703	0.22338	0.43112	0.20092	0.42514
Sex
Normal vs. Male	1.62448e-12	1.62448e-12	1.62437e-12	1.62448e-12	1.62448e-12	<1E-12	1.62437e-12	<1E-12	0.00044155
Normal vs. Female	1.0003e-11	1.62448e-12	<1E-12	1.62448e-12	<1E-12	<1E-12	1.62437e-12	<1E-12	0.0061839
Male vs. Female	0.077003	0.052999	0.23254	0.41464	0.095601	0.54902	0.41224	0.028041	0.52738
Age, years
Normal vs. 21-40	0.0054615	2.421e-05	0.00020444	9.8529e-05	0.002924	1.85201e-05	6.031e-05	0.00109885	0.112023
Normal vs. 41-60	1.62437e-12	<1E-12	<1E-12	<1E-12	1.62437e-12	<1E-12	<1E-12	<1E-12	0.00166098
Normal vs. 61-80	1.62437e-12	<1E-12	<1E-12	<1E-12	<1E-12	1.62437e-12	1.62459e-12	1.62437e-12	0.00101893
Normal vs. 81-100	5.8651e-05	0.000141905	0.00021907	5.5854e-05	0.0047833	0.00015506	0.00024228	1.96571e-05	0.18984
21-40 vs. 41-60	0.52044	0.75898	0.52706	0.395	0.68374	0.72374	0.32104	0.80098	0.73196
21-40 vs. 61-80	0.53282	0.7789	0.5925	0.25954	0.67806	0.38194	0.113599	0.84084	0.2532
21-40 vs. 81-100	0.4021	0.82658	0.25256	0.79556	0.5581	0.28002	0.6962	0.32508	0.44708
41-60 vs. 61-80	0.96462	0.9483	0.81346	0.50622	0.8982	0.44678	0.38274	0.93556	0.055018
41-60 vs. 81-100	0.0097358	0.55694	0.0076772	0.61554	0.20556	0.049119	0.138982	0.110939	0.48998
61-80 vs. 81-100	0.0103616	0.57206	0.0112001	0.44104	0.24272	0.0168787	0.039663	0.104359	0.028385
Tumor grade
Normal vs. grade 1	0.044745	6.6025e-07	0.0036422	0.000116974	0.0197031	0.00069611	0.036402	0.025084	0.146919
Normal vs. grade 2	1.8725e-12	1.62448e-12	<1E-12	<1E-12	<1E-12	<1E-12	<1E-12	1.62437e-12	0.0043035
Normal vs. grade 3	1.62459e-12	<1E-12	<1E-12	<1E-12	<1E-12	1.62448e-12	<1E-12	1.62437e-12	0.030019
Normal vs. grade 4	1.1655e-10	1.63347e-12	5.51748e-12	7.83495e-12	7.6467e-09	1.529e-11	5.6355e-10	1.5887e-11	0.0108847
Grade 1 vs. 2	0.4541	0.47536	0.5849	0.56656	0.57154	0.26644	0.53612	0.56576	0.00126391
Grade 1 vs. 3	0.12158	0.023357	0.228	0.60836	0.35158	0.039983	0.180584	0.195919	0.0152989
Grade 1 vs. 4	0.00058424	0.0115558	0.0028566	0.115298	0.37992	0.00023567	0.00082182	0.00073801	0.0085372
Grade 2 vs. 3	0.0170963	0.0040227	0.081965	0.0031182	0.23436	0.082697	0.039776	0.0083755	0.89916
Grade 2 vs. 4	0.000124642	0.0101164	0.00084487	0.0047776	0.27734	0.00042176	0.000160641	1.84614e-05	0.068757
Grade 3 vs. 4	0.0048419	0.40314	0.0109419	0.171881	0.68562	0.0053153	0.0024825	0.00054375	0.085077
ccRCC subtypes
Normal vs. ccA subtype	2.12574e-12	1.62437e-12	1.11022e-16	<1E-12	1.62437e-12	<1E-12	1.62437e-12	<1E-12	0.95822
Normal vs. ccB subtype	1.62437e-12	1.62448e-12	<1E-12	<1E-12	1.62448e-12	1.62448e-12	1.62437e-12	1.11022e-16	0.00037522
ccA vs. ccB subtype	1.94448e-05	0.24912	7.6802e-05	0.50374	0.2215	0.23552	0.00146457	1.6455e-07	0.00036092
Nodal metastasis status
Normal vs. N0	1.11022e-16	1.62448e-12	1.62448e-12	<1E-12	<1E-12	<1E-12	1.62448e-12	<1E-12	0.00052425
Normal vs. N1	0.0032204	0.00066114	0.00097997	0.0040622	0.0107354	0.0044824	0.0064758	0.0025784	0.054077
N0 vs. N1	0.138903	0.198996	0.178836	0.20462	0.28562	0.24414	0.129337	0.057982	0.136475
Values in bold indicate P<0.05. SLAMF, signaling lymphocyte activation molecule family; TPM, transcripts per million; cc, clear cell; RCC, renal cell carcinoma.
